# Supplementary material
Source: PubMed Central journal article supplement (PMC5566517)
Supplement: 10.1074_M117.799247_jbc.M117.799247-2.pdf [file 10.1074_M117.799247_jbc.M117.799247-2.pdf]

## SUPPLEMENTAL MATERIAL

### THE ACTIVITIES OF THE C-TERMINAL REGIONS OF THE FORMIN PROTEIN DISHEVELED-ASSOCIATED ACTIVATOR OF MORPHOGENESIS (DAAM) IN ACTIN DYNAMICS

Andrea Teréz Vig<sup>1</sup>, István Földi<sup>2</sup>, Szilárd Szikora<sup>2</sup>, Ede Migh<sup>2</sup>, Rita Gombos<sup>2</sup>, Mónika Ágnes Tóth<sup>1</sup>, Tamás Huber<sup>1</sup>, Réka Pintér<sup>1</sup>, Gábor Csaba Talián<sup>1</sup>, József Mihály<sup>2</sup>, Beáta Bugyi<sup>1,3,\*</sup>

\* to whom the correspondence should be addressed: Beáta Bugyi, University of Pécs, Medical School, Department of Biophysics, Pécs, Szigeti str. 12, H-7624, Hungary, Phone: +36-72-536-265, E-mail: [beata.bugyi@aok.pte.hu](mailto:beata.bugyi@aok.pte.hu)

#### **Institutions:**

<sup>1</sup> University of Pécs, Medical School, Department of Biophysics, Szigeti str. 12, Pécs, H-7624, Hungary

<sup>2</sup> Biological Research Centre, Hungarian Academy of Sciences, Institute of Genetics, MTA-SZBK NAP B Axon Growth and Regeneration Group, Temesvári krt. 62, Szeged, H-6726, Hungary

<sup>3</sup> Szentágothai Research Center, Ifjúság str. 34, Pécs, H-7624, Hungary

#### **Supplemental movie 1. Filopodia dynamics in *Drosophila* primary neurons.**

Time lapse sequence of filopodia dynamics of a neuronal growth cone expressing Actin5C::GFP. Scale bar = 5  $\mu$ m, elapsed time is given in seconds.
